# Supplementary material for: Cholera Outbreaks in India, 2011–2020: A Systematic Review
Source: Int J Environ Res Public Health. 2022 May 8;19(9):5738. doi: 10.3390/ijerph19095738 (PMC9099871; doi:10.3390/ijerph19095738)

**Supplementary Figure S1.** Flow chart showing evidence search and selection of studies (Cholera outbreaks in India, 2011– 2020).

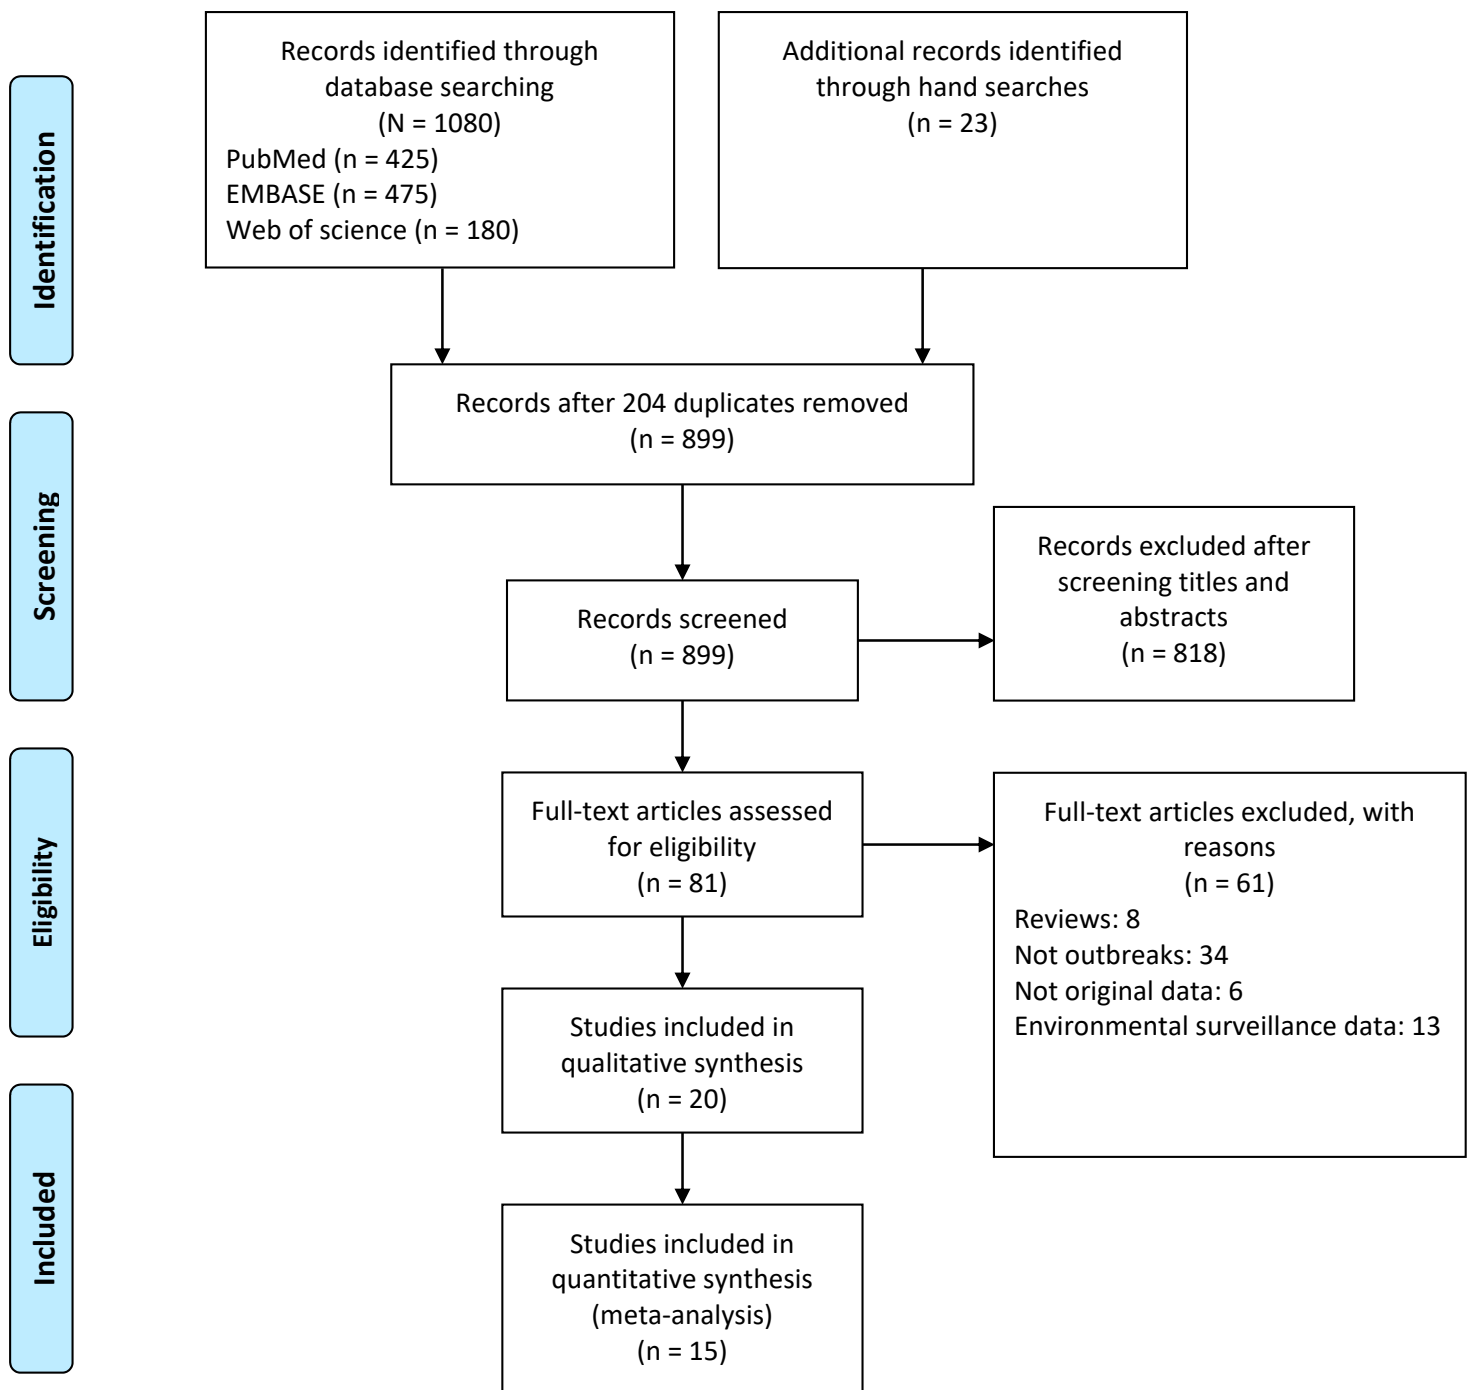

**Supplementary Figure S2.**

Cholera outbreaks in selected state and union territories comparing 2011-2015 with 2016-2020. The states of Tamil Nadu and Haryana did not cholera outbreaks during 2016-2020.

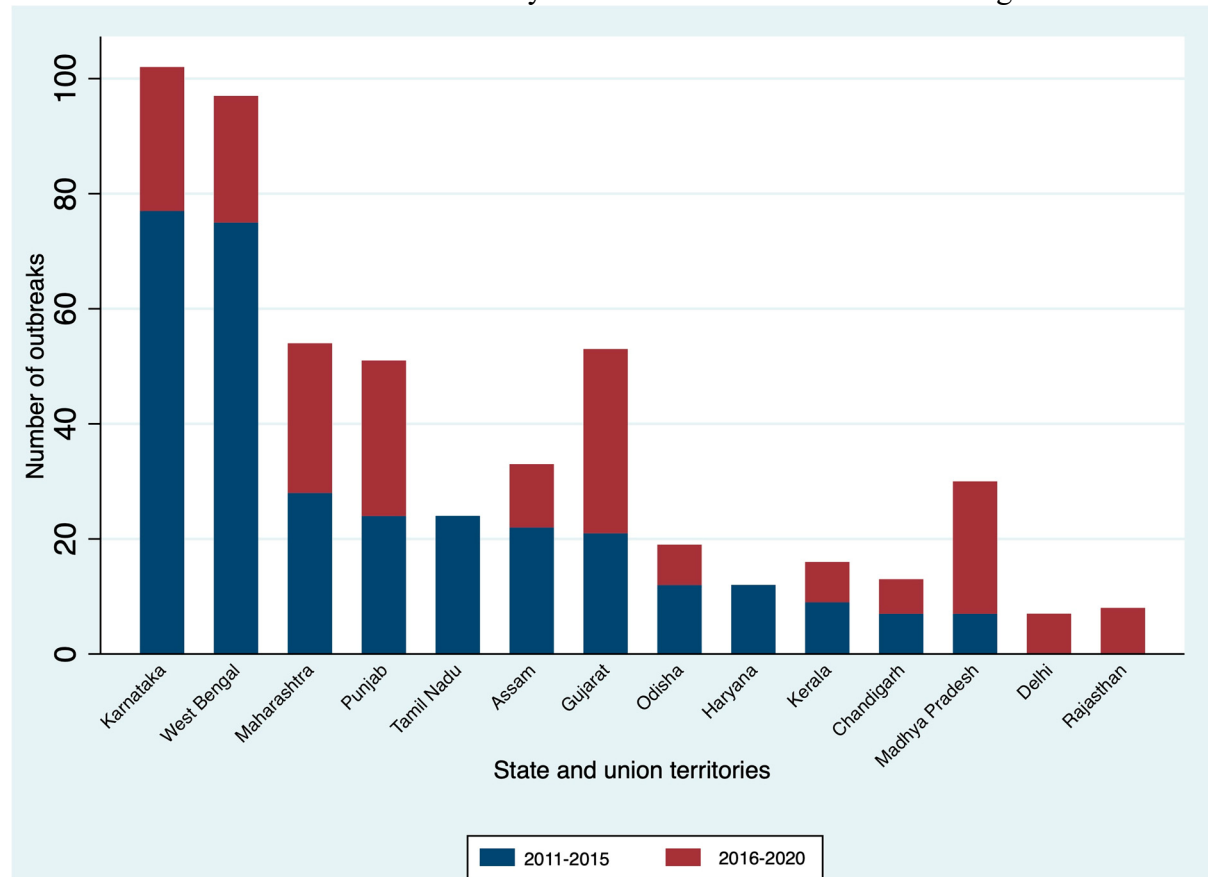

Supplement: Supplementary file 1 [file ijerph-19-05738-s001.zip › ijerph-1686518-supplementary.pdf]
